# Supplementary material for: Effect of Lipopolysaccharides on Liver Tumor Metastasis of twist1a/krasV12 Double Transgenic Zebrafish
Source: MDPI journal article supplement (doi:10.3390/biomedicines10010095), 2022-01-02
Supplement: s1 [file s1]

(A)

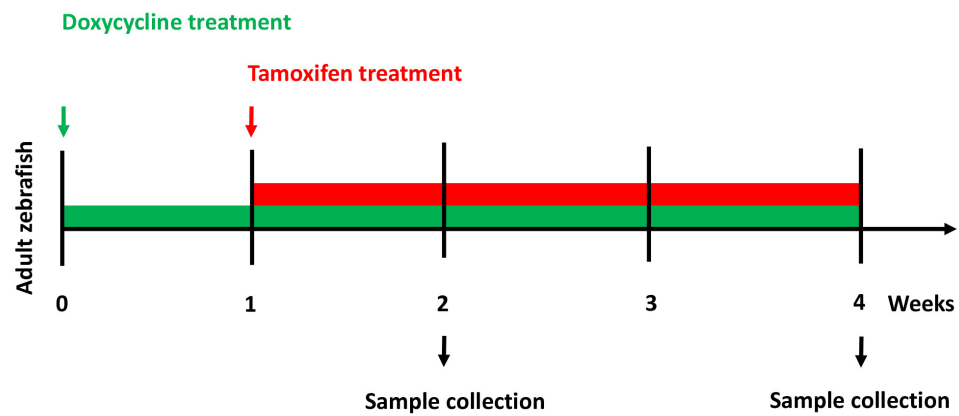

(B)

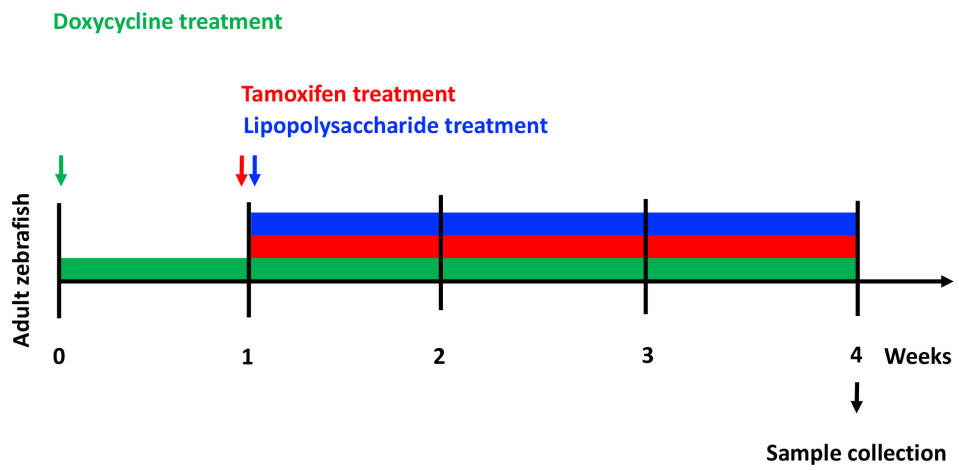

**Figure S1.** Experimental design and long-term treatment samples were collected weekly for investigation. **(A and B)** A total of different time points were 2 or 2 and 4 wpi.
